# Supplementary material for: Relationship Between Low‐Density Lipoprotein Cholesterol and Lipoprotein(a) Lowering in Response to PCSK9 Inhibition With Evolocumab
Source: PubMed Central journal article supplement — J Am Heart Assoc. 2019 Feb 13;8(4):e010932. doi: 10.1161/JAHA.118.010932 (PMC6405654; doi:10.1161/jaha.118.010932), 2019-02-13
Supplement: JAH3-8-e010932-s001.pdf [file JAH3-8-e010932-s001.pdf]

# **SUPPLEMENTAL MATERIAL**

**Table S1. Phase 3 Trials With Evolocumab Included in the Study Cohort.**

| Study Name                    | N    | Trial Population                                                                            | Background Lipid Therapy                             | Treatment Arms                                                                                        |
|-------------------------------|------|---------------------------------------------------------------------------------------------|------------------------------------------------------|-------------------------------------------------------------------------------------------------------|
| MENDEL-2 <sup>1</sup>         | 614  | FH and NFH, low CV risk                                                                     | None                                                 | Placebo (n=154)<br>Ezetimibe (n=154)<br>Evolocumab 140 mg Q2W (n=153)<br>Evolocumab 420 mg QM (n=153) |
| LAPLACE-2 <sup>2</sup>        | 1896 | FH and NFH                                                                                  | Statins*                                             | Placebo (n=558)<br>Ezetimibe (n=221)<br>Evolocumab 140 mg Q2W (n=555)<br>Evolocumab 420 mg QM (n=562) |
| GAUSS-2 <sup>3</sup>          | 307  | Intolerant to $\geq 2$ statins <sup>†</sup><br>FH and NFH<br>$\geq$ NCEP ATP III LDL-C goal | Non-ezetimibe lipid-lowering<br>therapy <sup>‡</sup> | Ezetimibe (n=102)<br>Evolocumab 140 mg Q2W (n=103)<br>Evolocumab 420 mg QM (n=102)                    |
| RUTHERFORD-<br>2 <sup>4</sup> | 329  | HeFH                                                                                        | Statin ( $\pm$ ezetimibe)                            | Placebo (n=109)<br>Evolocumab 140 mg Q2W (n=110)<br>Evolocumab 420 mg QM (n=110)                      |

CV indicates cardiovascular; FH, familial hypercholesterolemia; HeFH, heterozygous familial hypercholesterolemia; LDL-C, low-density lipoprotein cholesterol; NCEP ATP III, National Cholesterol Education Program Adult Treatment Panel III; NFH, nonfamilial hypercholesterolemia; Q2W, every 2 weeks; QM, monthly.

\*Patients randomized to 1 of 5 background statin doses: moderate intensity (atorvastatin 10 mg, simvastatin 40 mg, or rosuvastatin 5 mg daily) or high intensity (atorvastatin 80 mg or rosuvastatin 40 mg daily).

†Intolerance defined as inability to tolerate any statin dose or increase in dose above the smallest tablet strength because of intolerable muscle-related side effects.

‡At screening, low or atypical dose of statin permitted: weekly doses of  $\leq 70$  mg atorvastatin;  $\leq 140$  mg simvastatin, pravastatin, lovastatin;  $\leq 35$  mg rosuvastatin;  $\leq 280$  mg fluvastatin.

## Supplemental References:

1. Koren MJ, Lundqvist P, Bolognese M, Neutel JM, Monsalvo ML, Yang J, Kim JB, Scott R, Wasserman SM, Bays H, MENDEL-2 Investigators. Anti-PCSK9 monotherapy for hypercholesterolemia: the MENDEL-2 randomized, controlled phase III clinical trial of evolocumab. *J Am Coll Cardiol*. 2014;63:2531-2540.
2. Robinson JG, Nedergaard BS, Rogers WJ, Fialkow J, Neutel JM, Ramstad D, Somaratne R, Legg JC, Nelson P, Scott R, Wasserman SM, Weiss R, LAPLACE-2 Investigators. Effect of evolocumab or ezetimibe added to moderate- or high-intensity statin therapy on LDL-C lowering in patients with hypercholesterolemia: the LAPLACE-2 randomized clinical trial. *JAMA*. 2014;311:1870-1882.
3. Stoes E, Colquhoun D, Sullivan D, Civeira F, Rosenson RS, Watts GF, Bruckert E, Cho L, Dent R, Knusel B, Xue A, Scott R, Wasserman SM, Rocco M, GAUSS-2 Investigators. Anti-PCSK9 antibody effectively lowers cholesterol in patients with statin intolerance: the GAUSS-2 randomized, placebo-controlled phase 3 clinical trial of evolocumab. *J Am Coll Cardiol*. 2014;63:2541-2548.
4. Raal FJ, Stein EA, Dufour R, Turner T, Civeira F, Burgess L, Langslet G, Scott R, Olsson AG, Sullivan D, Hovingh GK, Cariou B, Gouni-Berthold I, Somaratne R, Bridges I, Scott R, Wasserman SM, Gaudet D, RUTHERFORD-2 Investigators. PCSK9 inhibition with evolocumab (AMG 145) in heterozygous familial hypercholesterolaemia (RUTHERFORD-2): a randomised, double-blind, placebo-controlled trial. *Lancet*. 2015;385:331-340.
